# Supplementary material
Source: PubMed Central journal article supplement (PMC4187089)
Supplement: ACI-05-0721-s001.pdf [file ACI-05-0721-s001.pdf]

# Pre-CPOE Resident Survey

## Introduction

This is a brief (~5 minute) survey intended to gather baseline information on ordering practices before we implement pediatric CPOE.

The survey includes questions regarding common inpatient pediatric diagnosis and ask you about what testing or treatment would be appropriate for each situation. The goal is to assess the impact of the Clinical Decision Support (CDS) tools that have been embedded into the Powerplans for each diagnosis. There will be a follow-up survey after implementation of CPOE to evaluate for any changes.

Your responses will help us improve the our order entry and electronic health record. Your participation in this survey is voluntary and all responses will be anonymous. Neither your answers nor your decision to participate in this survey will influence your evaluations in any way.

Thank you in advance!

Andrew Shriner, MD  
Benjamin Bauer, MD  
Emily Webber, MD

Riley Pediatric Hospital Medicine

# Pre-CPOE Resident Survey

## Demographics

### 1. What is your current level of training?

- PGY-1
- PGY-2
- PGY-3
- PGY-4
- Other (please specify)

### 2. Approximately how long you have been using an electronic health record (EHR) system in the care of your patients?

- I have never used an EHR before
- Used for < 1 year
- Used for 1-2 years
- Used for 2-3 years
- Used for > 3 years

### 3. Please describe your prior experience with computer provider order entry (CPOE).

- I have never used CPOE before
- I have used CPOE, but with another EHR system. (i.e. EPIC, etc.)
- I have used CPOE with Powerchart/Cerner, but at another IU Health Facility
- I have used CPOE with Powerchart/Cerner, but at another institution
- Other (please specify)

### 4. Have you already completed your required CPOE training?

- Yes
- No

### 5. Which statement most accurately reflects how you feel about CPOE?

- I like things the way things are and wish they weren't changing
- I can't wait for CPOE, I think it will improve patient care
- I wish I could just use a pen and paper for all documentation

## Pre-CPOE Resident Survey

### 6. How would you describe yourself and how you respond to change?

- I'm an early adopter of change
- I'm a late adopter of change
- I'm a curmudgeon when it comes to change (i.e. - I hate change!)

# Pre-CPOE Resident Survey

## Attitude and preceptions

### 1. Completing admission orders for most patients takes

- < 5 minutes
- 5 - 10 minutes
- 10 - 15 minutes
- >15 minutes

### 2. When I write a new order on a patient, I receive a page from pharmacy or nursing

- never
- sometimes
- often

### 3. I use order sets (chose all that apply)

- whenever they are available
- multiple times every day
- only when required (ie. for parenteral antibiotics)
- I prefer not to use order sets

# Pre-CPOE Resident Survey

## Questions

**1. Which of the following is the best initial empiric antibiotic therapy for uncomplicated, community acquired pneumonia?**

- Amoxicillin
- Azithromycin
- Cefotaxime
- Ceftriaxone
- Other (please specify)

**2. In children > 2 months of age with a presumed, uncomplicated, febrile urinary tract infection (UTI), initial antibiotic therapy should always be given parenterally.**

- True
- False

**3. Children > 2 months of age with uncomplicated, febrile UTIs require a renal/bladder ultrasound as part of their inpatient work-up.**

- True
- False

**4. Which of the following radiologic and laboratory studies should be routinely ordered in patients > 2 months of age for the diagnosis of bronchiolitis? (Mark all that apply)**

- Blood gas
- CBC
- Basic metabolic panel
- Comprehensive metabolic panel
- Respiratory viral DFA
- Rapid RSV testing
- Rapid Flu testing
- Chest X-ray
- None of the above

## Pre-CPOE Resident Survey

**5. Which of the following should ROUTINELY be ordered when admitting a patient presenting with an apparent life-threatening event (ALTE)?**

- CT head w/o IV contrast
- XR Chest PA and Lateral
- Upper GI with small bowel follow-through to evaluate for reflux
- Barium esophagram to evaluate for aspiration
- None of the above

**6. For an otherwise stable, non-toxic patient being admitted for IV antibiotics to treat a cellulitis that is suspected to be due to methicillin-resistant staphylococcus aureus (MRSA), which of the following is the most appropriate initial empiric antibiotic to order?**

- Clindamycin
- Vancomycin

Other (please specify)

**7. Presume you started clindamycin for the patient with cellulitis in #6 above, but the infection continues to progress. Which of the following antibiotics would you add for additional coverage?**

- Vancomycin
- Ampicillin-Sulbactam
- A Cephalosporin

Other (please specify)

**8. Presume you start vancomycin for the patient with cellulitis in #6 above, but the infection continues to progress. Which of the following antibiotics would you add for additional coverage?**

- Clindamycin
- Ampicillin -sulbactam
- A Cephalosporin

Other (please specify)

## Pre-CPOE Resident Survey

**9. For an otherwise stable patient admitted for IV antibiotics to treat cellulitis that is suspected to be due to methicillin susceptible staphylococcus aureus (MSSA), the most appropriate initial antibiotic treatment to order would be:**

- Cefazolin
- Clindamycin
- Nafcillin
- Vancomycin

**10. Which of the following is the most appropriate antibiotic treatment for cellulitis due to streptococcal bacteria?**

- Clindamycin
- Nafcillin
- Ampicillin
- TMP-SMX

# Pre-CPOE Resident Survey

## Questions

**1. In patients presenting with an ALTE, which of the following is true?**

- A screening CBC and BMP should be sent on all patients
- A blood and urine culture should be sent on all patients
- Respiratory viral studies should be sent on all patients
- All of the above are true
- There is a lack of evidence to support standard laboratory testing in these patients

**2. Inhaled bronchodilators should be ordered ROUTINELY for treatment of all patients with bronchiolitis.**

- True
- False

**3. Azithromycin should be ROUTINELY ordered for all school-aged children admitted with uncomplicated community-acquired pneumonia to cover for possible infection with atypical organisms.**

- True
- False

**4. A skeletal survey should be performed in cases of suspected physical abuse for all patients < 2 years of age?**

- True
- False

**5. A head CT is indicated for any child less than 12 months of age with EITHER evidence of unexplained or clearly-abusive trauma OR with symptoms concerning for CNS injury.**

- True
- False

**6. You should order a bleeding time if you are attempting to rule out an underlying bleeding disorder in a child admitted for possible non-accidental trauma?**

- Yes
- No



# Pre-CPOE Resident Survey

## 7. Describe how often you write call orders on for each of the following:

|                   | Never                 | Hardly ever           | Sometimes             | Most of the time      | All of the time       |
|-------------------|-----------------------|-----------------------|-----------------------|-----------------------|-----------------------|
| Temperature       | <input type="radio"/> |
| Heart rate        | <input type="radio"/> |
| Blood pressure    | <input type="radio"/> |
| Respiratory rate  | <input type="radio"/> |
| Oxygen saturation | <input type="radio"/> |

## 8. I think standardized call orders are most useful for:

# Pre-CPOE Resident Survey

## End of Survey

Thanks again for all of your time and help with our study!

**1. As always, any comments or feedback that you may have is appreciated!**
